# Supplementary material
Source: publisher site journal article supplement (https://www.dovepress.com/article/supplementary_file/602749/Supplemental%20Table.docx)
Supplement: Supplementary file 1 [file Supplemental%20Table.docx]

**Supplemental Table 1.** Variable Assignment Table

| Variable | Meaning | Assignment |
| --- | --- | --- |
| X1 | Age | Continuous variable |
| X2 | Platelet count | Continuous variable |
| X3 | AST/ALT ratio | Continuous variable |
| X4 | Total bilirubin | Continuous variable |
| X5 | International normalized ratio | 1=>1.2,0=≤1.2 |
| X6 | Liver stiffness measurement | Continuous variable |
| Y | Cirrhosis diagnosis | 1=Cirrhosis group, 0=Non-cirrhosis group |
